# Supplementary material for: Evolution of a Human-Specific De Novo Open Reading Frame and Its Linked Transcriptional Silencer
Source: MDPI journal article supplement (doi:10.3390/ijms25073924), 2024-03-31
Supplement: s1 [file s1]

# Evolution of a human specific *de novo* open reading frame and its linked transcriptional silencer

Nicholas Delihias

<https://orcid.org/0000-0002-1704-2587>

Department of Microbiology and Immunology  
Renaissance School of Medicine  
Stony Brook University  
Stony Brook, NY 11794 USA

Email: [Nicholas.delihias@stonybrook.edu](mailto:Nicholas.delihias@stonybrook.edu)  
Tel. # 001 631 286-9427

**Supplementary file S1**

**Figure S1a.** Predicted transmembrane domain of the 68 aa sequence. Data obtained using the DeepTMHMM prediction program (<https://dtu.biolib.com/DeepTMHMM>) [1].

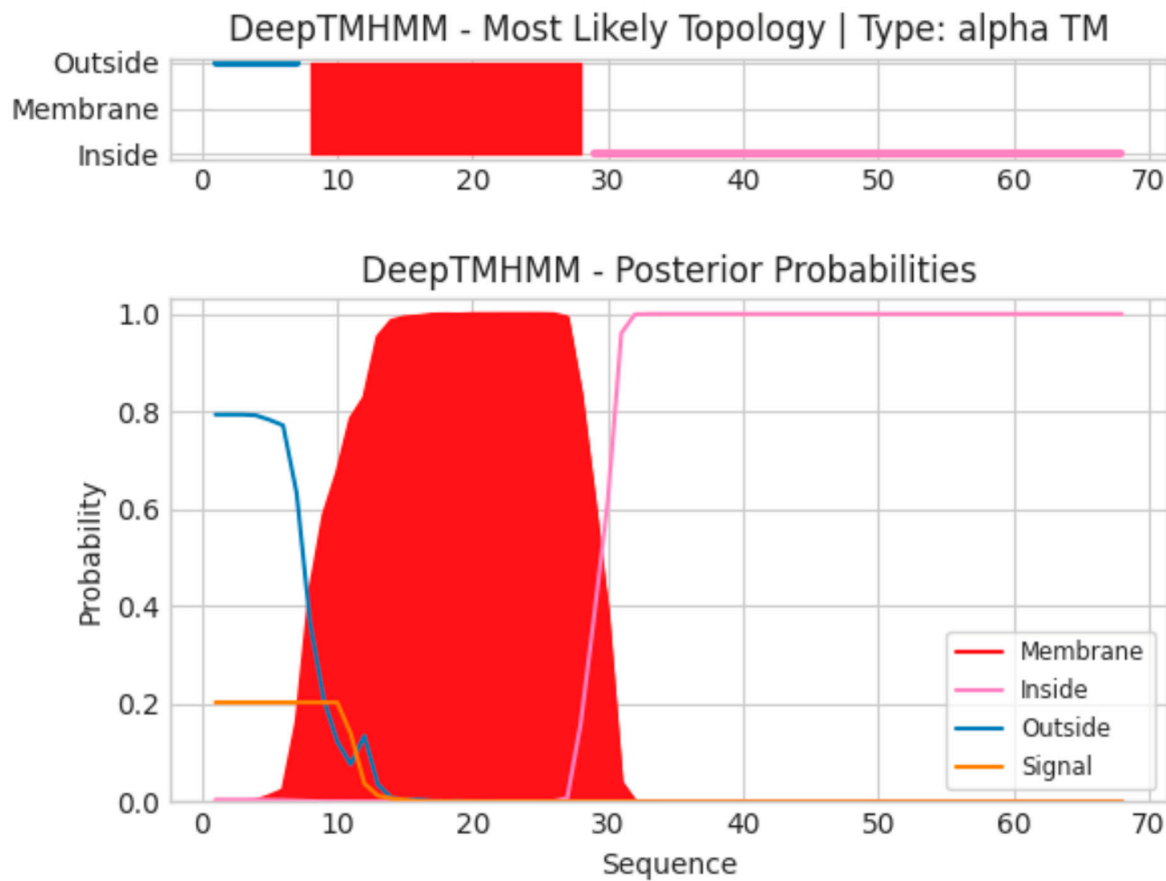

**Figure S1b.** The 68 aa ORF base composition. The 68 aa ORF nt sequence is rich in G+C.

A (15% 33) | T (22% 43) | G (31% 66) | C (32% 69)

**Figure S2.** Alignment of nt sequences from the 68 aa ORF, the intervening sequence and LOC130067579 ATAC-STARR-seq. lymphoblastoid silencer. Color code; teal: 3'end of 68 aa ORF and 5' end of the silencer sequence LOC130067579 that overlap; green: the silencer sequence LOC130067579 that overlaps the intervening sequence, purple: the start of the 107 aa sequence: All overlapping alignments show 100% identity.

```

CLUSTAL O(1.2.4) multiple sequence alignment

68aa.3'end.positions51-207          ggaccgcgacctccgcaagacgctaatagtgccgcgacaacctggccttcggcgcccgga 60
Intervening.sequence                -----tgcgcgacaacctggccttcggcgcccgga 0
LOC130067579.ATAC-STARR-seq.lymphoblastoid.silent -----tgcgcgacaacctggccttcggcgcccgga 31

68aa.3'end.positions51-207          ggctctga----- 67
Intervening.sequence                -----ggcgacttgcgaagggaataggcgagccacccggcgccctcccccagcccc 53
LOC130067579.ATAC-STARR-seq.lymphoblastoid.silent ggctctgagccgacttgcgaagggaataggcgagccacccggcgccctcccccagcccc 91

68aa.3'end.positions51-207          ----- 67
Intervening.sequence                -----cccgcccgcccgagcccgagaccccaaggcagagggagccgacctgttgcacctcca 113
LOC130067579.ATAC-STARR-seq.lymphoblastoid.silent -----cccgcccgcccgagcccgagaccccaaggcagagggagccgacctgttgcacctcca 151

68aa.3'end.positions51-207          ----- 67
Intervening.sequence                -----ggctatccctctgcagccctgggcccctcccgacagagggcccgaggtggcctggcagtagag 173
LOC130067579.ATAC-STARR-seq.lymphoblastoid.silent -----ggctatccctctgcagccctgggcccctcccgacagagggcccgaggtggcctggcagtagag 211

68aa.3'end.positions51-207          ----- 67
Intervening.sequence                -----gtggggcacttaggtgccggcctgagccagggttgctctccgtgtcaagccgactcacc 233
LOC130067579.ATAC-STARR-seq.lymphoblastoid.silent -----gtggggcacttaggtgcc----- 230

68aa.3'end.positions51-207          ----- 67
Intervening.sequence                -----cagagccaccctcccaagctcaggggcatcctccgctgggcccagtgccctttgcgctg 293
LOC130067579.ATAC-STARR-seq.lymphoblastoid.silent -----cagagccaccctcccaagctcaggggcatcctccgctgggcccagtgccctttgcgctg 230

68aa.3'end.positions51-207          ----- 67
Intervening.sequence                -----cgcagcactctgcccctccactggactcagggc 324
LOC130067579.ATAC-STARR-seq.lymphoblastoid.silent -----cgcagcactctgcccctccactggactcagggc 230

230 bp, length of silencer

38 bp, length overlap of LOC130067579.ATAC-STARR-seq. with 68aa ORF nt sequence

192 bp, length of LOC130067579.ATAC-STARR-seq. overlap with intervening sequence

132 bp, length of intervening sequence between the silencer and 107 aa ORF with no overlap

```

**Figure S3a.** Alignment of the *SMIM45* 68 aa elephant shark nt sequence, the 68aa nt. (207) human sequence, LOC130067579 ATAC-STARR-seq. lymphoblastoid silencer, and the ATAC-STARR-seq. silencer that overlaps the 68aa ORF. The alignment shows

co-alignment of the total silencer sequence and the silencer that overlaps the 68 aa ORF with the start of the 68 aa ORF sequence (yellow highlighted). Therefore, the alignment shows no synteny as the silencer sequence that overlaps the 68 aa ORF sequence should align at the end of the 68 aa ORF up to position 207. The alignment thus appears to be random.

CLUSTAL O(1.2.4) multiple sequence alignment

```

SMIM45.68aa.elephant.shark      ATGCCTCACTTCCTGGACTGGTTTGTGCCCGTCTACCTGTTGGCGTCCATCCTGGTCTCTG 60
68aa.nt.(207)nt.human          atgccgacacttcctgaactgattcgtaccgactctacttgcacatctcggatcctcattctg 60
LOC130067579.ATAC-STARR-seq.lymphoblastoid.silent.ref -tgccgacaaacctgaccttcggcggcccggaaggtctgaagccgacttgcaagggagatag 59
ATAC-STARR-seq.in.68aa.ORF     -tgccgacaaacctgaccttcggcggcccggaaggtctga----- 38
                                ***  **  *****  *  *  *  *

SMIM45.68aa.elephant.shark      GTGG---CATTGCGCGCCTGCGTTTACTACTGCGAGCCCGGGCTAC-AAGACGCCACACA 115
68aa.nt.(207)nt.human          gtggg---cttcgacacctgcacatctacttgcagccgggacctac-aggagacgcaca 115
LOC130067579.ATAC-STARR-seq.lymphoblastoid.silent.ref gcggcgagcaccggcgccctcccccagcccgcccgcccgcccgagcccgagaccccca 119
ATAC-STARR-seq.in.68aa.ORF     ----- 38

SMIM45.68aa.elephant.shark      AGTGGCGGACTCAGGGTCCCGTCGGCGAACAGGACGTC----- 153
68aa.nt.(207)nt.human          agtggcgacatgcagcagccctggtgagccgcgacctc----- 153
LOC130067579.ATAC-STARR-seq.lymphoblastoid.silent.ref --agcagagggagagccgacctgttgccctccacactatccctctgcagcctgggccct 177
ATAC-STARR-seq.in.68aa.ORF     ----- 38

SMIM45.68aa.elephant.shark      --CGCAAGGCGTCGATGGTCCGGGAGAACATGGGATTCCGTC-----GACCTCTGA 207
68aa.nt.(207)nt.human          --cgcaagacactaatgatacgcagacaacctgaccttcgagcggccggagatctga 207
LOC130067579.ATAC-STARR-seq.lymphoblastoid.silent.ref cccgacagagaccccgatagcctggcagatgagagtgagacact-tagatgcct-- 230
ATAC-STARR-seq.in.68aa.ORF     ----- 38

```

**Figure S3b.** Alignment of the silencer that overlaps the intervening sequence, the LOC130067579 ATAC-STARR-seq. lymphoblastoid silencer sequence, the human 68 aa ORF sequence, and the redfish *SMIM45* (Ensembl primary assembly: fErpCal1.1:12:30561086:30562492:-1) sequence. The alignment shows co-alignment of the silencer with the 5' end of the 68 aa ORF thus displaying no synteny and random alignments.

```

silencer.overlap.with.intervening.only.human
LOC130067579.ATAC-STARR-seq.lymphoblastoid.silent.ref
68aa.nt.(207)nt.human
red.fish.primary_assembly:fErpCal1.1:12:30561086:30562492:-1
-----
tgtacaattgttagataaatcaagggaagtaatgtattttttatccttccacagcccccacc 600

silencer.overlap.with.intervening.only.human
LOC130067579.ATAC-STARR-seq.lymphoblastoid.silent.ref
68aa.nt.(207)nt.human
red.fish.primary_assembly:fErpCal1.1:12:30561086:30562492:-1
-----gccgacttcaaaagggatag 21
-tgscgcacaacctgaccttcggcgacccggagatctgagccgacttgcnaagggatag 59
atgscgcacttctggaactgattcgtgccgtctacttgatcatctggtcctc---at 56
atgscgcacttcttagactgatttgcctgtatttgatgatctctattcta---at 656
** *

silencer.overlap.with.intervening.only.human
LOC130067579.ATAC-STARR-seq.lymphoblastoid.silent.ref
68aa.nt.(207)nt.human
red.fish.primary_assembly:fErpCal1.1:12:30561086:30562492:-1
gccccggcaccggcgccctccccagccgccccggcggcggagacccc-c 80
gccccggcaccggcgccctccccagccgccccggcggcggagacccc-c 118
tctggtgggttccggcctgcatctacttctgaagccggcctgcagggggcgcaca 116
tctggttggatttggagcctgcatctacttctgaacccggcctacaagaagcccaca 716
* * * * *

silencer.overlap.with.intervening.only.human
LOC130067579.ATAC-STARR-seq.lymphoblastoid.silent.ref
68aa.nt.(207)nt.human
red.fish.primary_assembly:fErpCal1.1:12:30561086:30562492:-1
aaggcagagggggcgacctgttgacctccacgctatccct-----ctgcag-- 129
aaggcagagggggcgacctgttgacctccacgctatccct-----ctgcag-- 167
gtggcgcctgagcgcctctgttgacctccacgctatccct-----ctgcag-- 176
gtggcgcctgagcgcctctgttgacctccacgctatccct-----ctgcag-- 776
* * * * *

silencer.overlap.with.intervening.only.human
LOC130067579.ATAC-STARR-seq.lymphoblastoid.silent.ref
68aa.nt.(207)nt.human
red.fish.primary_assembly:fErpCal1.1:12:30561086:30562492:-1
---c-----ctgggccctccgaca-----gagggcccaggtgcctagca 167
---c-----ctgggccctccgaca-----gagggcccaggtgcctagca 205
caacctggcccttccggcgcccgaggtctga-----gagggcccaggtgcctagca 207
caatttggatttccgtactcgggatatatgacagcaatttgggagctgcttgccttgc 836
* * * * *

silencer.overlap.with.intervening.only.human
LOC130067579.ATAC-STARR-seq.lymphoblastoid.silent.ref
68aa.nt.(207)nt.human
red.fish.primary_assembly:fErpCal1.1:12:30561086:30562492:-1
gtggagatggagcacttagatgcct----- 192
gtggagatggagcacttagatgcct----- 230
----- 207
cttgagctcaacagcatctgagaattcttttcttttctcagttcccccacatcta 896

```

**Figure S4a.** Alignment of *Xenopus tropicalis* (tropical clawed frog sequence that is homologous to the silencer1 segment in the 68 aa ORF (exonic silencer)).

```

#=====
#
# Aligned_sequences: 2
# 1: Xenopus.homolo.t.silencer.in.68aa
# 2: silencer.in.68aa.38bp
# Matrix: EDNAFULL
# Gap_penalty: 10.0
# Extend_penalty: 0.5
#
# Length: 39
# Identity:      27/39 (69.2%)
# Similarity:    27/39 (69.2%)
# Gaps:          2/39 ( 5.1%)
# Score: 85.0
#
#=====
Xenopus.homol 1 tgagggacaatctggcctacagcctccctgatgtatag- 38
               ||.|||.|.|.|.|.|.|.|.|.|.|.|.|.|.|.|
silencer.in.6 1 tgcgcgacaacctggccttcggcgcccgagggtct-ga 38

#-----
#-----

```

**Figure S4b.** Alignment of *Caretta caretta* (Loggerhead turtle) sequence that is homologous to the silencer1 nt sequence within the 68 aa ORF.











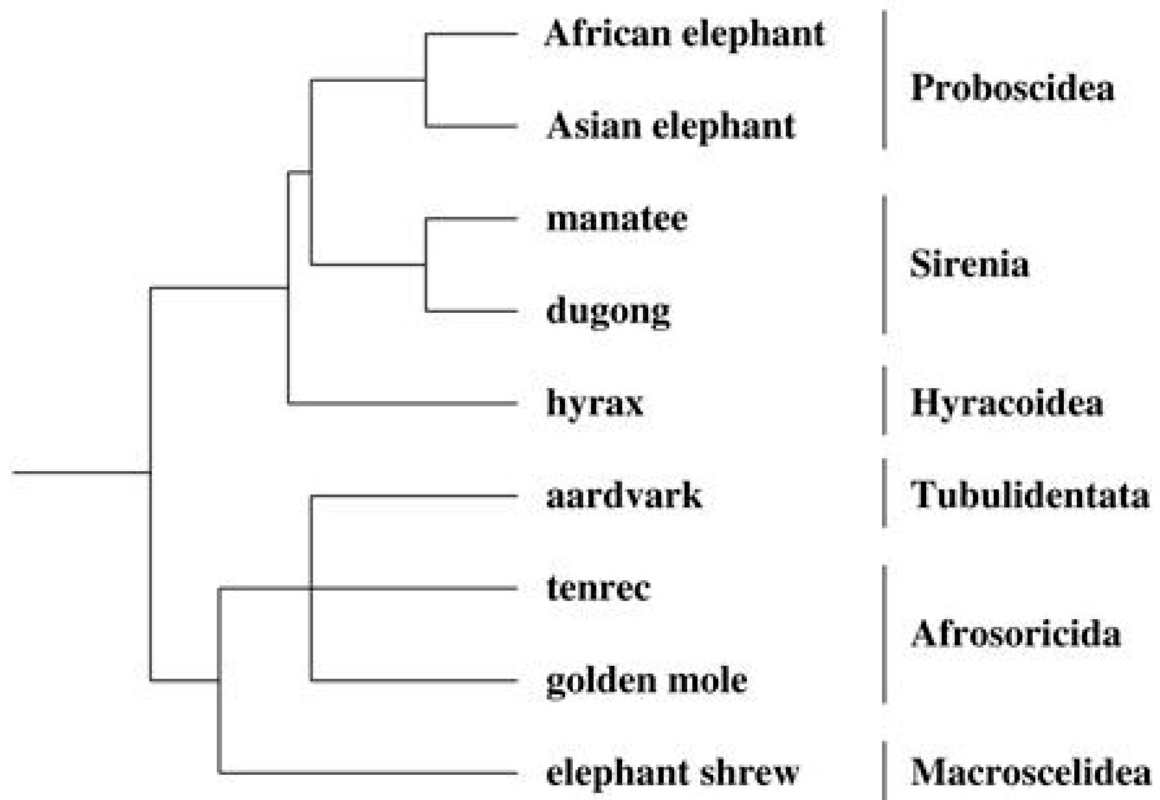

**Figure S7 a.** Alignment of the elephant nt sequence homologous to the early development sequence with the analogous human early development nt sequence. Data obtained using Nucleotide BLAST two sequences (<https://blast.ncbi.nlm.nih.gov/BlastAlign.cgi>).

>elephant.homolog.to.107aa.nt.190-243.bp  
tcaggtttagaatgggtgaggtaggtgtgactgggggtatgcagagggcaagccc

>human107aa.nt.fragment.190-243.bp  
tcaggcttggaactggtgagggtgtgtggtgggggtatgcagagggataagacc

Job Title

[elephant.homolog.to.107aa.nt.190-243.bp](#)

Query Descr

[elephant.homolog.to.107aa.nt.190-243.bp](#)

Query Length

56

Subject Descr

[human107aa.nt.fragment.190-243.bp](#)

Subject Length

54

## human107aa

Sequence ID: **Query\_346459** Length: **54** Number of Matches: **1**

Range 1: 1 to 54 [Graphics](#)

[Next Match](#)

[Previous Match](#)

Alignment statistics for match #1

| Score         |   | Expect                                                    | Identities | Gaps     | Strand    |    |
|---------------|---|-----------------------------------------------------------|------------|----------|-----------|----|
| 41.0 bits(44) |   | 1e-09                                                     | 44/56(79%) | 2/56(3%) | Plus/Plus |    |
| Query         | 1 | TCAGGTTTAGAATGGGTGAGGTGGGTGTGGCTGGGGGTGTGCAGAAGGGCAAGCCC  |            |          |           | 56 |
|               |   |                                                           |            |          |           |    |
| Sbjct         | 1 | TCAGGCTTGGAAC TGGTGAGG-GTGTGTGG-TGGGGGTATGCAGAGGGATAAGACC |            |          |           | 54 |

**Figure S7 b.** The elephant aa sequence homologous to SGLELVRVCGGGMQRDKT aligned with the human early developmental sequence. Point mutations and a frameshift mutations alter the early developmental aa sequence.

>elephant.Frame1.homolog  
SGLEWVRVWVLGVCRRAS

>human.SGLELVRVCGGGMQRDKT.nt.seq  
SGLELVRVCGGGMQRDKT

**Job Title**

**elephant.Frame1.homolog**

**Query Descr**

elephant.Frame1.homolog

**Query Length**

18

**Subject Descr**

human.107aa.SGLELVRVCGGGMQRDKT.nt.seq

**Subject Length**

18

**human.SGLELVRVCGGGMQRDKT.nt.seq** Sequence ID: **Query\_501325** Length: **18** Number of Matches: **1**

**Range 1: 1 to 9** [Graphics](#)

[Next Match](#)

[Previous Match](#)

**Alignment statistics for match #1**

| Score         | Expect | Identities | Positives | Gaps      |
|---------------|--------|------------|-----------|-----------|
| 19.7 bits(39) | 8e-05  | 8/14(57%)  | 8/14(57%) | 5/14(35%) |

|       |   |                |    |
|-------|---|----------------|----|
| Query | 1 | SGLEWVRVWVLGVC | 14 |
|       |   | SGLE VR VC     |    |
| Sbjct | 1 | SGLELVR-----VC | 9  |

**Figure S8 a.** Alignment of the aardvark nt sequence that is homologous to the early development nt sequence with the analogous human early development nt sequence.

```
#
#
# Percent Identity Matrix - created by Clustal2.1
#
#
1: aardvark.homolog.to.SGLELVRVCGGGMQRDKT.nt.seq 100.00 56.60
2: SGLELVRVCGGGMQRDKT.nt.seq 56.60 100.00

CLUSTAL O(1.2.4) multiple sequence alignment

aardvark.homolog.to.SGLELVRVCGGGMQRDKT.nt.seq      tcaggtttagaattggtgagagaggtgtggctggcccagtgtaagggcaacc- 54
SGLELVRVCGGGMQRDKT.nt.seq      tcaggcttggaactggtgaggggtgtgtgggtggg-gtatgcagaggataagacc 54
***** ** ** * ***** * * * * * ** * ** * * *
```

#####

**No significant E value**

**Figure S8 b.** The aardvark aa sequence homologous to SGLELVRVCGGGMQRDKT aligned with the human early developmental sequence.

>aardvark5'3'Frame.1

**SGLELVREVWLAQCEGQP**

>SGLELVRVCGGGMQRDKT.nt.seq

SGLELVRVCGGGMQRDKT

#### Job Title

**aardvark5'3'Frame.1**

#### Query Descr

aardvark5'3'Frame.1

#### Query Length

18

#### Subject ID

lcllQuery\_50429 (amino acid)

#### Subject Descr

SGLELVRVCGGGMQRDKT.nt.seq

#### Subject Length

18

#### SGLELVRVCGGGMQRDKT.nt.seq

Sequence ID: **Query\_50429** Length: **18** Number of Matches: **1**

Range 1: 1 to 7 [Graphics](#)

[Next Match](#)

[Previous Match](#)

#### Alignment statistics for match #1

| Score             | Expect | Identities | Positives | Gaps    |
|-------------------|--------|------------|-----------|---------|
| 24.0 bits(49)     | 2e-06  | 7/7(100%)  | 7/7(100%) | 0/7(0%) |
| Query 1 SGLELVR 7 |        |            |           |         |
| SGLELVR           |        |            |           |         |
| Sbjct 1 SGLELVR 7 |        |            |           |         |

**Figure S9. a.** Alignment of the Lesser hedgehog (tenrec) nt sequence that is homologous to the early development sequence with the analogous human early development nt sequence. **a.**

```

>hedgehog.homolog.early.dev.seq.
ggcagtttagaactggccaggggctgggggtggagggtgcaggagagcagtc 660

>SGLELVRVCGGGMORDKT.nt.seq
tcaggcttggaactggtgagggtgtgtggtgggggtatgcagagggataagacc

#
#
# Percent Identity Matrix - created by Clustal2.1
#
#
1: hedgehog.homolog.early.dev.seq. 100.00 55.56
2: SGLELVRVCGGGMORDKT.nt.seq 55.56 100.00

CLUSTAL O(1.2.4) multiple sequence alignment

hedgehog.homolog.early.dev.seq. ggcagtttagaactggccaggggctgggggtggagggtgcaggagagcagtc 54
SGLELVRVCGGGMORDKT.nt.seq tcaggcttggaactggtgagggtgtgtggtgggggtatgcagagggataagacc 54
* * * * *

```

**No significant E value**

**Figure S9. b.** The Lesser hedgehog aa sequence homologous to SGLELVRVCGGGMQRDKT aligned with the human early developmental sequence.





**a.**

```
>cape.golden.mole.homolog
ttagaactggcaagg-----ggtgtatggctggga
tgtgcgcaagggcaaggtc

>SGLELVRVCGGGMQRDKT.nt.seq
tcaggcttgaactggtgagggtgtgtggtgggggtatgcagagggataagacc

#=====
#
# Aligned_sequences: 2
# 1: cape.golden.mole.homolog
# 2: SGLELVRVCGGGMQRDKT.nt.seq
# Matrix: EDNAFULL
# Gap_penalty: 10.0
# Extend_penalty: 0.5
#
# Length: 55
# Identity:      33/55 (60.0%)
# Similarity:    33/55 (60.0%)
# Gaps:          7/55 (12.7%)
# Score: 95.0
#
#
#=====

cape.golden.m      1 -----ttagaactggcaagggggtgtatggctgggatgtgcgcaagggca      44
                   ||.|||||||.|| |||||.|||.|||.|||.|||.|||.|||.||
SGLELVRVCGGGM      1 tcaggcttgaactggtga-gggtgtgtggtgggggtatgcagagggata      49
                   ||..|

cape.golden.m      45 aggtc      49
                   ||..|
SGLELVRVCGGGM      50 agacc      54
```

No significant E value

**Figure S10 b.** The cape golden mole aa sequence homologous to SGLELVRVCGGGMQRDKT aligned with the human early developmental sequence.

```

>cape.golden.mole.5'3'Frame1
LELARGVWLGCAQGQG

>SGLELVRVCGGGMQRDKT.
SGLELVRVCGGGMQRDKT

#=====
#
# Aligned_sequences: 2
# 1: cape.golden.mole.5'3'Frame1
# 2: SGLELVRVCGGGMQRDKT.
# Matrix: EBLSUM62
# Gap_penalty: 10.0
# Extend_penalty: 0.5
#
# Length: 22
# Identity:      6/22 (27.3%)
# Similarity:    6/22 (27.3%)
# Gaps:          10/22 (45.5%)
# Score: 14.5
#
#
#=====

cape.golden.m      1 --LELARGVWLGCAQGQG----      16
                   |||.l   .l..l..
SGLELVRVCGGGM      1 SGLELVR----VCGGGMQRDKT      18

```

No significant ER value.

**Figure S11 a.** Alignment of the human 107 aa mRNA, the early developmental sequence, the cape elephant shrew genomic nt sequence, and the 68 aa nt sequence that is homologous to the early development sequence with the analogous human early development nt sequence. The alignment shows no synteny between the 68 aa ORF and 107 aa ORF nt sequences. However, the human **SGLELVRVCGGGMQRDKT** nt sequence aligns with a segments of the Cape elephant shrew, starting with position 33353. This Cape elephant shrew sequence was used in Figs. S11 b,c.

|                                         |                                                              |       |
|-----------------------------------------|--------------------------------------------------------------|-------|
| human.107aa.mRNA                        | tttggagggatgtcagcttagaccagccagccgcacccgcggggc-----tcaggctt   | 197   |
| SGLELVRVCGGGMQRDKT.nt.seq               | -----tcaggctt                                                | 8     |
| Septin3-CENPM.cape.eleph.shrew.revcomp1 | tgaggtagaacttattcagaagttcagtcagctccaccccttcagagggcagtgaggaag | 33360 |
| 68aa.nt.(207)nt.human                   | -----                                                        | 207   |
| human.107aa.mRNA                        | ----ggaactggtagggatattatggtgg--ggtatgcagagg-----             | 234   |
| SGLELVRVCGGGMQRDKT.nt.seq               | ----ggaactggtagggatattatggtgg--ggtatgcagagg-----             | 45    |
| Septin3-CENPM.cape.eleph.shrew.revcomp1 | ggcagaccctaattgggaagtgagatcatgtatttcattcgaatcatgaatgaagat    | 33420 |
| 68aa.nt.(207)nt.human                   | -----                                                        | 207   |

**Figure S11 b.** The nt sequence alignment of the cape elephant shrew sequence that aligns with early developmental sequence (from Figure S11a) and the the early developmental sequence. The results show an insignificant identity of 38%.

```
>cape.eleph.shrew.homolog
tgaggaagggcagaccctaattgggaaggtgaggtgcatgtgtttgcatctg

>SGLELVRVCGGGMQRDKT.nt.seq
tcaggcttggaactggtgaggggtgtgtgtgggggtatgcagagggataagacc
```

```
#=====
#
# Aligned_sequences: 2
# 1: cape.eleph.shrew.homolog
# 2: SGLELVRVCGGGMORDKT.nt.seq
# Matrix: EDNAFULL
# Gap_penalty: 10.0
# Extend_penalty: 0.5
#
# Length: 73
# Identity:      28/73 (38.4%)
# Similarity:    28/73 (38.4%)
# Gaps:          41/73 (56.2%)
# Score: 57.0
#
#
#=====
```

```
cape.eleph.sh      1  tgaggaagggcagaccctaattggga--ggtga-ggtgcatgt----- 40
                        .|||.l      l.||||  ||||| |||  |||
SGLELVRVCGGGM      1  -----tcaggc-----ttggaactggtgaggggtg--tgtggtgggg 34

cape.eleph.sh      41  gtttgcattctg----- 51
                        ||.||||  |
SGLELVRVCGGGM      35  gtatgca---gagggataagacc 54
```

```
#-----
```

**Figure S11. c.** The aa sequence alignment of the homologous cape elephant shrew sequence with the early developmental sequence. The results show an insignificant identity of 17%.

```
>cape.eleph.shrew.Frame2
EEGQTLMGR-GACVC

>SGLELVRVCGGGMQRDKT.nt.seq
SGLELVRVCGGGMQRDKT

#=====
#
# Aligned_sequences: 2
# 1: cape.eleph.shrew.Frame2
# 2: SGLELVRVCGGGMQRDKT.nt.seq
# Matrix: EBL0SUM62
# Gap_penalty: 10.0
# Extend_penalty: 0.5
#
# Length: 23
# Identity:      4/23 (17.4%)
# Similarity:    5/23 (21.7%)
# Gaps:          14/23 (60.9%)
# Score: 7.5
#
#
#=====

cape.eleph.sh      1 EEGQTLMGRGACVC----- 14
                   .|.|.:.  ||
SGLELVRVCGGGM     1 -SGLELVR---VCGGGMQRDKT 18

#-----
```

**Figure S12.** Displayed are the alignments with color coordinated DNA bases of the early developmental sequence and homologous sequences from genomes of the Afrothere, mouse and human species. Data was obtained using MAFFT online service: multiple sequence alignment, interactive sequence choice and visualization, <http://msa.biojs.net/> [3]. The totally conserved bases are readily visible. The first six

bases of the cape golden mole sequence are missing that indicates no significant alignment in the region. Thus, the homologous sequence is smaller in the cape golden mole. This may suggest a closer proximity to the root species than the other species.

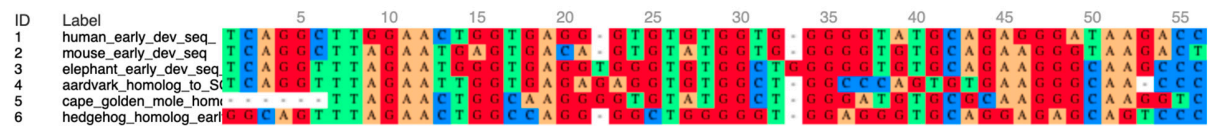

## References

1. Hallgren J. et al. DeepTMHMM predicts alpha and beta transmembrane proteins using deep neural networks. bioRxiv preprint 2022  
<https://doi.org/10.1101/2022.04.08.487609>
2. . Nishihara H, Satta Y, Nikaido M, Thewissen JG, Stanhope MJ, Okada N. A retroposon analysis of Afrotherian phylogeny. Mol Biol Evol. 2005, 22(9):1823-1833. [https://doi: 10.1093/molbev/msi179](https://doi.org/10.1093/molbev/msi179).
3. Katoh K, Rozewicki J, Yamada KD, MAFFT online service: multiple sequence alignment, interactive sequence choice and visualization. Brief Bioinform. 2019 20:1160-1166. [https://doi: 10.1093/bib/bbx108](https://doi.org/10.1093/bib/bbx108)
